# Supplementary material for: Chimeric antigen receptor T-cell therapy in adults with B-cell acute lymphoblastic leukemia
Source: PubMed Central journal article supplement — Blood Adv. 2022 Mar 7;6(5):1608–18. doi: 10.1182/bloodadvances.2020003482 (PMC8905689; doi:10.1182/bloodadvances.2020003482), 2022-03-07
Supplement: advancesADV2020003482C-suppl1.pdf [file advancesADV2020003482C-suppl1.pdf]

## **SEARCH STRATEGY**

### **Medline search strategy:**

(MH "Precursor Cell Lymphoblastic Leukemia-Lymphoma+")

AB "acute lymph\* leuk#emia" OR TI "acute lymph\* leuk#emia"

AB ( ("b cell" N2 ("acute lymphoblastic leuk#emia" OR "all")) ) OR TI ( ("b cell" N2 ("acute lymphoblastic leuk#emia" OR "all")) )

AB "precursor b-cell lymphoblastic leuk#emia-lymphoma" OR TI "precursor b-cell lymphoblastic leuk#emia-lymphoma"

AB "precursor cell lymphoblastic leuk#emia lymphoma" OR TI "precursor cell lymphoblastic leuk#emia lymphoma"

AB "b-all" OR TI "b-all"

S1 OR S2 OR S3 OR S4 OR S5 OR S6

(MH "Receptors, Antigen, T-Cell+")

AB ( ("car" OR "chimeric antigen receptor") N3 ("immunotherap\*" OR "therap\*" OR "t-cell\*")) ) OR TI ( ("car" OR "chimeric antigen receptor") N3 ("immunotherap\*" OR "therap\*" OR "t-cell\*")) )

AB "car-t" OR TI "car-t"

AB "cart19" OR TI "cart19"

S8 OR S9 OR S10 OR S11

S7 AND S12

### **Embase search strategy**

acute lymphoblastic leukemia'/de

'acute lymph\* leuk\*mia':ti,ab

('b cell' NEAR/2 ('acute lymphoblastic leuk\*mia' OR 'all')):ti,ab

'precursor b-cell lymphoblastic leuk\*mia-lymphoma':ti,ab

'precursor cell lymphoblastic leuk\*mia-lymphoma':ti,ab

'b-all':ti,ab

'acute lymphoblastic leukemia'/de OR 'acute lymph\* leuk\*mia':ti,ab OR ('b cell' NEAR/2 ('acute lymphoblastic leuk\*mia' OR 'all')):ti,ab OR 'precursor b-cell lymphoblastic leuk\*mia-lymphoma':ti,ab OR 'precursor cell lymphoblastic leuk\*mia-lymphoma':ti,ab OR 'b-all':ti,ab

chimeric antigen receptor t-cell immunotherapy'/de

((('car' OR 'chimeric antigen receptor') NEAR/3 ('immunotherap\*' OR 'therap\*' OR 't-cell\*'))):ti,ab

'car-t':ti,ab

'cart19':ti,ab

'chimeric antigen receptor t-cell immunotherapy'/de OR ((('car' OR 'chimeric antigen receptor') NEAR/3 ('immunotherap\*' OR 'therap\*' OR 't-cell\*'))):ti,ab OR 'car-t':ti,ab OR 'cart19':ti,ab

('acute lymphoblastic leukemia'/de OR 'acute lymph\* leuk\*mia':ti,ab OR ('b cell' NEAR/2 ('acute lymphoblastic leuk\*mia' OR 'all')):ti,ab OR 'precursor b-cell lymphoblastic leuk\*mia-lymphoma':ti,ab OR 'precursor cell lymphoblastic leuk\*mia-lymphoma':ti,ab OR 'b-all':ti,ab) AND ('chimeric antigen receptor t-cell immunotherapy'/de OR ((('car' OR 'chimeric antigen receptor') NEAR/3 ('immunotherap\*' OR 'therap\*' OR 't-cell\*'))):ti,ab OR 'car-t':ti,ab OR 'cart19':ti,ab)

### **Cochrane search strategy**

MeSH descriptor: [Precursor Cell Lymphoblastic Leukemia-Lymphoma] explode all trees

("precursor b-cell lymphoblastic leukemia-lymphoma" OR "acute lymphoblastic leukemia" OR "precursor lymphoblastic leukemia-lymphoma" OR "b-all"):ti,ab,kw (Word variations have been searched)

#1 OR #2

MeSH descriptor: [Receptors, Antigen, T-Cell] explode all trees

("chimeric antigen receptor therapy" OR "chimeric antigen receptor immunotherapy" OR "CAR-T" OR "CART19"):ti,ab,kw (Word variations have been searched)

#4 OR #5

#3 AND #6

**Table S1: Baseline patient characteristics**

| FIRST AUTHOR AND YEAR | n  | AGE                       |                   | PRIOR TREATMENTS                      |                   |                    |                       | DISEASE STATUS PRIOR TO CAR-T |                         |                        |                              | EXTRAMEDULLARY OR CNS DISEASE |            | Ph+ (n, %) | PMID      |                                |
|-----------------------|----|---------------------------|-------------------|---------------------------------------|-------------------|--------------------|-----------------------|-------------------------------|-------------------------|------------------------|------------------------------|-------------------------------|------------|------------|-----------|--------------------------------|
|                       |    | MEDIAN AGE (RANGE), YEARS | ADULT OR COMBINED | MEDIAN PRIOR LINES OF THERAPY (RANGE) | PRIOR BiTE (n, %) | PRIOR CAR-T (n, %) | PRIOR AlloHSCT (n, %) | MEDIAN RELAPSES (RANGE)       | CR OR ≤5% BLASTS (n, %) | MRD NEGATIVE CR (n, %) | RELAPSE OR >5% BLASTS (n, %) | MEDIAN BLAST % (RANGE)        | EMD (n, %) |            |           | CNS DISEASE (n, %) OR EXCLUDED |
| DAI, 2020             | 6  | 23.5 (17 to 44)           | Combined          | NA                                    | NA                | 0                  | 0                     | 2 (1 to 3)                    | 1 (16.7)                | 0                      | 5 (83.3)                     | 46.9 (3.6 to 89.1)            | NA         | 1 (16.7)   | 1 (16.7)  | 32245502                       |
| DAI, 2015             | 9  | 35 (15 to 65)             | Combined          | NA                                    | 0                 | 0                  | 3 (33.3)              | NA                            | 3 (33.3)                | 0                      | 6 (66.7)                     | 73.4 (<5% to 94.9)            | 4 (44.4)   | 2 (22.2)   | 5 (55.6)  | 26451310                       |
| FREY, 2020            | 35 | 34 (21 to 70)             | Adult             | 3 (1 to 7)                            | 11 (31.4)         | 0                  | 13 (37.1)             | NA                            | 2 (5.7)                 | 0                      | 27 (77.1)                    | NA                            | NA         | Excluded   | 3 (8.6)   | 31815579                       |
| GU, 2020              | 20 | 18 (3 to 52)              | Combined          | 2 (1 to 5)                            | NA                | NA                 | NA                    | NA                            | 3 (15)                  | 0                      | 17 (85)                      | 35.5 (3 to 96)                | 2 (10)     | Excluded   | 2 (10)    | 32894185                       |
| HAY, 2019             | 53 | 39 (20 to 76)             | Adult             | 3 (1 to 11)                           | 10 (18.9)         | 0                  | 23 (43.4)             | NA                            | 19 (35.9)               | 0                      | 34 (64.15)                   | 28 (0-98.5)                   | 18 (34)    | 5 (9.4)    | 11 (20.8) | 30728140                       |
| HUA, 2020             | 11 | 28 (12 to 39)             | Combined          | NA                                    | 0                 | 2 (18.2)           | 11 (100)              | 2 (1 to 4)                    | 1 (9.1)                 | 0                      | 10 (90.9)                    | NA                            | NA         | NA         | 5 (45.5)  | 32507386                       |
| HU, 2017              | 15 | 32 (7 to 57)              | Combined          | NA                                    | 0                 | 0                  | 7 (46.7)              | 2 (1 to 6)                    | 1 (6.7)                 | 1 (6.7)                | 13 (86.7)                    | 63.50 (3 to 83)               | 1 (6.7)    | Excluded   | 4 (26.7)  | 28039267                       |
| JIANG, 2019           | 58 | 28 (10 to 65)             | Combined          | 3 (1 to 4)                            | 0                 | 0                  | 3 (5.2)               | 2 (1 to 3)                    | 15 (25.9)               | 6 (10.3)               | 37 (63.8)                    | 12.10 (0.01 to 94.9)          | NA         | NA         | 7 (12.1)  | 31321805                       |
| LI, 2018              | 10 | 33 (18 to 59)             | Adult             | 2 (1 to 3)                            | 0                 | 0                  | 1 (10)                | 2 (1 to 3)                    | 4 (40)                  | 0                      | 6 (60)                       | 12.75 (0.5 to 58.5)           | 2 (20)     | Excluded   | 2 (20)    | 29637550                       |
| MA, 2020              | 9  | 34.1 (16 to 57)           | Combined          | NA                                    | NA                | 0                  | 0                     | NA                            | 4 (44.4)                | 0                      | 5 (55.6)                     | 5.20 (1.09 to 63.9)           | NA         | 2 (22.2)   | 2 (22.2)  | 32774493                       |
| ORTÍZ-MALDONADO, 2020 | 38 | 24.5 (3 to 67)            | Combined          | 4 (2 to 10)                           | 9 (23.7)          | 0                  | 33 (86.8)             | NA                            | NA                      | 0                      | 17 (44.7)                    | NA                            | NA         | NA         | NA        | 33010231                       |
| PARK, 2018            | 53 | 44 (23 to 64)             | Adult             | 3 (2 to 4)                            | 13 (24.5)         | 0                  | 19 (35.9)             | NA                            | 15 (28.3)               | 6 (11.3)               | 27 (50.9)                    | 63 (5 to 97)                  | 5 (9.4)    | NA         | 16 (30.2) | 29385376                       |
| SHAH, 2021            | 55 | 40 (IQR 28 to 52)         | Adult             | 2 (2 to 3)                            | 25 (45)           | 0                  | 23 (42)               | NA                            | 5 (9)                   | NA                     | 50 (91)                      | 60 (17 to 90)                 | 6 (11)     | 0          | 15 (27.2) | 34097852                       |
| WANG, BJH, 2020       | 23 | 42 (10 to 67)             | Combined          | 2 (2 to 3)                            | 0                 | 0                  | 0                     | NA                            | 0                       | 0                      | 23 (100)                     | 40.4 (8.2 to 87.5)            | 0          | 3 (13.1)   | 7 (30.4)  | 32232846                       |
| WANG, BLOOD, 2020     | 51 | 27 (9 to 62)              | Combined          | NA                                    | NA                | 0                  | 9 (17.7)              | 1 (1 to 3)                    | 13 (25.5)               | NA                     | 38 (74.5)                    | 59 (0.5-97.5)                 | NA         | 0*         | 13 (25.5) | 31697824                       |
| ZHANG, 2020           | 43 | 24 (4 to 60)              | Combined          | NA                                    | NA                | 0                  | 43 (100)              | NA                            | 13 (30.2)               | 0                      | 30 (69.7)                    | NA                            | 0          | NA         | 5 (11.6)  | 33077866                       |

\*7 patients with CNS2 disease were excluded, & modified intention to treat dataset

**Table S2: CAR-T characteristics**

| FIRST AUTHOR AND YEAR | n  | CAR-T CONSTRUCT (n, %)             | T-CELL ORIGIN                               | ANTIGEN TARGET                   | CD19 SCFV CLONE | DOSE                                                                |                                                                                 | LYMPHODEPLETION REGIMEN (n, %) |                 |          |          |
|-----------------------|----|------------------------------------|---------------------------------------------|----------------------------------|-----------------|---------------------------------------------------------------------|---------------------------------------------------------------------------------|--------------------------------|-----------------|----------|----------|
|                       |    |                                    |                                             |                                  |                 | MEDIAN DOSE                                                         | RANGE                                                                           | FLU/CY COMBINATIONS            | SINGLE AGENT CY | OTHER    | NONE     |
| DAI, 2020             | 6  | 41BB                               | Autologous                                  | Bispecific C19/22                | FMC63           | 2 X 10 <sup>6</sup> /kg                                             | 1.7 to 3X10 <sup>6</sup> /kg                                                    | 6 (100)                        | 0               | 0        | 0        |
| DAI, 2015             | 9  | 41BB                               | Autologous: 7 (77.8)<br>Allogenic: 2 (22.2) | CD19                             | FMC63           | 4.5 X 10 <sup>6</sup> /kg                                           | 3X10 <sup>6</sup> to 1X10 <sup>7</sup> /kg                                      | 0                              | 0               | 2 (22.2) | 7 (77.8) |
| FREY, 2020            | 35 | 41BB                               | Autologous                                  | CD19                             | Murine          | Total dose: 5 X 10 <sup>8</sup>                                     | Total dose: 5X10 <sup>7</sup> to 5X10 <sup>8</sup>                              | 5 (14.3)                       | 25 (71.4)       | 3 (8.6)  | 2 (5.7)  |
| GU, 2020              | 20 | 41BB                               | Autologous                                  | CD19                             | HI19α           | 5 X 10 <sup>6</sup> /kg                                             | 5X10 <sup>6</sup> /kg                                                           | 20 (100)                       | 0               | 0        | 0        |
| HAY, 2019             | 53 | 41BB                               | Autologous                                  | CD19                             | FMC63           | 2 X 10 <sup>5</sup> /kg                                             | 2X10 <sup>5</sup> to 2X10 <sup>6</sup> /kg                                      | 42 (79.2)                      | 9 (17)          | 2 (3.8)  | 0        |
| HUA, 2020             | 11 | 41BB                               | Allogenic                                   | CD19                             | FMC63           | 5 X 10 <sup>6</sup> /kg                                             | 1.5 to 10X10 <sup>6</sup> /kg                                                   | 11 (100)                       | 0               | 0        | 0        |
| HU, 2017              | 15 | 41BB                               | Autologous                                  | CD19                             | FMC63           | 3.7 X 10 <sup>6</sup> /kg                                           | 1.1 to 9.8 X10 <sup>6</sup> /kg                                                 | 15 (100)                       | 0               | 0        | 0        |
| JIANG, 2019           | 58 | 41BB                               | Autologous                                  | CD19                             | NA              | 1.66 X 10 <sup>6</sup> /kg                                          | 0.89 to 4X10 <sup>6</sup> /kg                                                   | 58 (100)                       | 0               | 0        | 0        |
| LI, 2018              | 10 | 41BB: 5 (50)<br>CD28: 5 (50)       | Autologous                                  | CD19                             | FMC63           | 0.62 x 10 <sup>6</sup> /kg                                          | 0.1 to 9.79 x 10 <sup>6</sup> /kg                                               | 9 (90)                         | 0               | 0        | 1 (10)   |
| MA, 2020              | 9  | 41BB                               | Autologous                                  | CD19                             | Murine          | 1 x 10 <sup>6</sup> /kg                                             | 1 x 10 <sup>6</sup> /kg                                                         | 9 (100)                        | 0               | 0        | 0        |
| ORTÍZ-MALDONADO, 2020 | 38 | 41BB                               | Autologous                                  | CD19                             | A3B1 hybridoma  | NA                                                                  | 0.4 to 5 x 10 <sup>6</sup> /kg                                                  | 38 (100)                       | 0               | 0        | 0        |
| PARK, 2018            | 53 | CD28                               | Autologous                                  | CD19                             | Murine          | 3 X 10 <sup>6</sup> /kg                                             | 1 to 3 x 10 <sup>6</sup> /kg                                                    | 10 (18.9)                      | 43 (81.1)       | 0        | 0        |
| SHAH, 2021            | 55 | CD28                               | Autologous                                  | CD19                             | Murine          | 1 X 10 <sup>6</sup> /kg                                             | 1 X 10 <sup>6</sup> /kg                                                         | 55 (100)                       | 0               | 0        | 0        |
| WANG, BJH, 2020       | 23 | 41BB                               | Autologous                                  | CD19                             | Humanized       | 1.0 x 10 <sup>6</sup> /kg                                           | 1 x 10 <sup>6</sup> /kg                                                         | 0                              | 0               | 23       | 0        |
| WANG, BLOOD, 2020     | 51 | Third generation                   | Autologous                                  | Sequential CD19 followed by CD22 | Murine          | CAR19: 2.6x 10 <sup>6</sup> /kg;<br>CAR22: 2.7x 10 <sup>6</sup> /kg | CAR19: 1.1 to 4.1X 10 <sup>6</sup> /kg; CAR22: 1.5 to 3.9 x 10 <sup>6</sup> /kg | 51 (100)                       | 0               | 0        | 0        |
| ZHANG, 2020           | 43 | 41BB: 25 (58.1)<br>CD28: 18 (41.9) | Allogenic                                   | CD19                             | NA              | 1.76 x 10 <sup>6</sup> /kg                                          | 0.4 to 12 x 10 <sup>6</sup> /kg                                                 | 39 (90.7)                      | 4 (9.3)         | 0        | 0        |

**Table S3: Outcomes and toxicities**

| FIRST AUTHOR, JOURNAL AND YEAR | n  | RESPONSE RATE |              |                 |              | 1-YEAR SURVIVAL (%) |             | MEDIAN FOLLOW UP months, (range) | ALLO-HSCT POST CAR-T (n, %) | RELAPSE (n, %) |                   |             | CYTOKINE RELEASE SYNDROME (n, %) |           | NEUROTOXICITY (n, %) |           | CRS GRADING CRITERIA | NEURO-TOXICITY GRADING CRITERIA |
|--------------------------------|----|---------------|--------------|-----------------|--------------|---------------------|-------------|----------------------------------|-----------------------------|----------------|-------------------|-------------|----------------------------------|-----------|----------------------|-----------|----------------------|---------------------------------|
|                                |    | CR/CRi        |              | MRD NEGATIVE CR |              | PFS (95% CI)        | OS (95% CI) |                                  |                             | TOTAL          | CD19 AND/OR CD22+ | CD19-       | ALL GRADE                        | ≥ GRADE 3 | ALL GRADE            | ≥ GRADE 3 |                      |                                 |
|                                |    | n/total       | % (95% CI)   | n/total         | % (95% CI)   |                     |             |                                  |                             |                |                   |             |                                  |           |                      |           |                      |                                 |
| DAI, 2020                      | 6  | 6/6           | 100 (54-100) | 6/6             | 100 (54-100) | 5 (0 -21)           | NA          | NA                               | 1 (16.6)                    | 3 (50)         | 2 (33.3)          | 1(16.7)     | 6 (100)                          | 0         | 0                    | 0         | Lee <sup>1</sup>     | ASTCT <sup>2</sup>              |
| DAI, 2015                      | 9  | 3/9           | 33 (7-70)    | 2/9             | 22 (3-60)    | 45 (8-77)           | 29 (5-59)   | NA                               | 0                           | 6 (66.7)       | NA                | NA          | NA                               | 3 (33.3)  | 2 (22.22)            | 0         | CTCAE <sup>3</sup>   | CTCAE                           |
| FREY, 2020                     | 35 | 24/35         | 69 (51-83)   | 19/19           | 100 (82-100) | 56 (38-70)          | 69 (53-80)  | 13 (0.2-52.7)                    | 9 (25.7)                    | NA             | NA                | NA          | 33 (94.3)                        | 22 (62.9) | 14 (40)              | 2 (5.7)   | Penn <sup>4</sup>    | CTCAE                           |
| GU, 2020                       | 20 | 18/20         | 90 (68 -99)  | 18/20           | 90 (68-99)   | 30 (11-52)          | 56 (35-73)  | 10 (0.5-24)                      | 14 (70)                     | 8 (40)         | 5 (25)            | 3 (15)      | 19 (95)                          | 9 (45)    | 13 (65)              | 8 (40)    | Lee                  | CTCAE                           |
| HAY, 2019                      | 53 | 45/53         | 85 (72-93)   | 45/53           | 85 (72-93)   | 47 (36-58)          | 64 (53-73)  | 30.9                             | 18 (34)                     | 22 (41.5)      | 14 (26.4)         | 6 (11.3)    | 40 (75.5)                        | 10 (18.9) | NA                   | 12 (22.6) | Lee                  | CTCAE                           |
| HUA, 2020                      | 11 | 8/11          | 73 (39-94)   | 7/11            | 64 (31-89)   | 57 (23-81)          | 80 (40-94)  | NA                               | 0                           | 1 (9.1)        | NA                | NA          | 6 (54.5)                         | 2 (18.2)  | 0                    | 0         | Lee                  | NA                              |
| HU, 2017                       | 15 | 12/15         | 80 (52-96)   | 12/15           | 80 (52-96)   | 6 (0-21)            | 32 (8-60)   | 4.7 (1- 9.4)                     | 4 (26.7)                    | 6 (40)         | 2 (13.3)          | 2 (13.3)    | 10 (66.7)                        | 6 (40)    | 5 (33.3)             | NA        | Lee                  | CTCAE                           |
| JIANG, 2019                    | 58 | 51/58         | 88 (77- 95)  | 47/58           | 81 (69-90)   | 48(35-60)           | 61 (48-72)  | 7.7 (0.7-33.9)                   | 21 (36.2)                   | 22 (37.9)      | 12 (20.7)         | 10 (17.2)   | NA                               | 22 (37.9) | NA                   | NA        | Lee                  | CTCAE                           |
| LI, 2018                       | 10 | 6/10          | 60 (26-88)   | 5/10            | 50 (19-81)   | 14(1-41)            | NA          | NA                               | 0                           | 5 (50)         | 5 (50)            | 0           | 8 (80)                           | 0         | NA                   | NA        | CTCAE                | NA                              |
| MA, 2020                       | 9  | 9/9           | 100 (66-100) | 9/9             | 100 (66-100) | NA                  | NA          | 11.3 (4.1-12.2)                  | 5 (55.6)                    | 2 (22.2)       | NA                | 1 (11.1)    | 8 (88.9)                         | 2 (22.2)  | NA                   | NA        | NA                   | NA                              |
| ORTÍZ-MALDONADO, 2020*         | 38 | 23/27         | 85 (66 -96)  | 23/27           | 85 (66-96)   | 34 (12-57)          | 64(29-86)   | 5.5 (1.9 -23.6)                  | 0                           | 15 (39.5)      | 13 (34.2)         | 2 (5.3)     | 21 (55.3)                        | 5 (13.2)  | NA                   | 1 (2.6)   | Lee                  | CTCAE                           |
| PARK, 2018                     | 53 | 44/53         | 83 (70-92)   | 32/48           | 67 (52-80)   | 26 (13-41)          | 52 (35-67)  | 29 (1 -65)                       | 17 (32.1)                   | 25 (47.2)      | 9 (17)            | 4 (7.5)     | 45 (84.9)                        | 14 (26.4) | 23 (43.4)            | 22        | MSKCC <sup>5</sup>   | CTCAE                           |
| SHAH, 2021                     | 55 | 39/55         | 71 (57-82)   | 42/55           | 76 (63 - 87) | 49 (18-74)          | 71 (56-82)  | 16.4 (IQR 13.8-19.6)             | 10 (18)                     | 12 (31)        | 6 of 9 (66)       | 3 of 9 (33) | 49 (89)                          | 13 (24)   | 33 (60)              | 14 (25)   | Lee                  | CTCAE                           |
| WANG, BJH, 2020                | 23 | 19/23         | 83 (61-95)   | 18/23           | 78 (56-93)   | 57 (33 – 76)        | 47 (27-65)  | NA                               | 5 (21.8)                    | 7 (30.4)       | 5 (21.7)          | 2 (8.7)     | 23 (100)                         | 5 (21.7)  | 3 (13)               | 1 (4.3)   | CTCAE                | CTCAE                           |
| WANG, BLOOD, 2020              | 51 | 48/51         | 94 (84-99)   | 48/50           | 96 (86-100)  | 53 (38-65)          | 63(48-74)   | 16.7 (1-33.3)                    | 12 (23.5)                   | 24 (47.1)      | 23 (45.1)         | 1 (2)       | NA                               | 11 (21.6) | 7 (13.7)             | 1 (2)     | Lee                  | CTCAE                           |
| ZHANG, 2020                    | 43 | 34/43         | 79 (64-90)   | NA              |              | 43 (24-61)          | 43(24-61)   | 7 (6-47)                         | NA                          | 25 (58.1)      | NA                | NA          | 38 (88.4)                        | 7 (16.3)  | 9 (20.9)             | 0         | ASTCT                | CTCAE                           |

\*CR, MRD negative CR, PFS, OS reported for patients >18 years

**Table S4: Meta-regression**

| Variable                                    | OS                          |         | PFS                       |         | CR                        |         | MRD negative remission    |         |
|---------------------------------------------|-----------------------------|---------|---------------------------|---------|---------------------------|---------|---------------------------|---------|
|                                             | coefficients                | p-value | coefficients              | p-value | coefficients              | p-value | coefficients              | p-value |
| Age                                         | -0.002 [-0.0292, 0.0253]    | 0.888   | -0.0133 [-0.0502, 0.0235] | 0.478   | -0.0079 [-0.0181, 0.0023] | 0.129   | -0.0050 [-0.0123, 0.0023] | 0.181   |
| Prior allotransplant                        | 0.0419 [-0.7437, 0.8275]    | 0.917   | -0.2521 [-1.157, 0.6529]  | 0.585   | -0.1350 [-0.4266, 0.1567] | 0.364   | -0.1245 [-0.2998, 0.0509] | 0.164   |
| Median blast percentage prior to transplant | 0.6220 [-0.5708, 1.8149]    | 0.307   | 0.3615 [-1.3829, 2.1058]  | 0.685   | -0.2851 [-0.7196, 0.1493] | 0.198   | -0.2370 [-0.5625, 0.0884] | 0.154   |
| T-cell construct (% 41BB)                   | 0.1396 [-0.3380, 0.6172]    | 0.567   | 0.1881 [-0.4907, 0.867]   | 0.587   | 0.0457 [-0.1489, 0.2402]  | 0.645   | -0.0085 [-0.1481, 0.1311] | 0.905   |
| T-cell origin (% autologous)                | -0.3050 [-0.9541 to 0.3441] | 0.357   | 0.3736 [-0.4694, 1.2166]  | 0.385   | -0.0206 [-0.2556, 0.2143] | 0.863   | 0.0941 [-0.0887, 0.2770]  | 0.313   |

**Table S5: Summary of log-transformate hazard rate of OS and information sources for individual studies**

| Study      | N  | OS               |              |                   | Individual Patient Data | log(Rate) (SE) per month |
|------------|----|------------------|--------------|-------------------|-------------------------|--------------------------|
|            |    | P(T>12)          | P(T>24)      | Median OS (month) |                         |                          |
| Ortiz      | 27 | 64.5% (40-89)%   |              |                   |                         | -3.309 (0.526)           |
| Wang       | 51 | 62.8% (48-74.4)% |              |                   |                         | -3.250 (0.232)           |
| Zhang      | 43 | 43.0% (25-62)%   |              |                   |                         | -2.654 (0.272)           |
| Jiang      | 58 | 61.1% (45-70)%   |              |                   |                         | -3.193 (0.206)           |
| Frey       | 35 |                  | 47% (28-63)% |                   |                         | -3.459 (0.259)           |
| Park       | 53 |                  |              | 12.9 (8.7-23.4)   |                         | -2.924 (0.252)           |
| Gu         | 20 |                  |              |                   | Data based on KM curve  | -3.041 (0.302)           |
| Shah       | 55 | 71%[57-82]%      |              |                   |                         | -3.556 (0.266)           |
| Wang BJH   | 23 |                  |              |                   | Data based on KM curve  | -2.776 (0.289)           |
| Dai (2015) | 9  |                  |              |                   | Reported Data           | -2.258 (0.447)           |
| Hua        | 11 |                  |              |                   | Reported Data           | -3.970 (0.707)           |
| Hu         | 15 |                  |              |                   | Reported Data           | -2.349 (0.408)           |
| Hay        | 53 |                  |              |                   | Data based on KM curve  | -3.290 (0.180)           |

**Table S6: Summary of log-transformate hazard rate of PFS and information sources for individual studies**

| Study      | N  | PFS                |              |                       | Individual Patient Data | log(Rate) (SE)<br>per month |
|------------|----|--------------------|--------------|-----------------------|-------------------------|-----------------------------|
|            |    | P(T>12)            | P(T>24)      | Median PFS<br>(month) |                         |                             |
| Ortiz      | 27 | 34.0% (12-57)%     |              |                       |                         | -2.409 (0.339)              |
| Wang       | 51 | 52.9% (38.5-65.5)% |              |                       |                         | -2.936 (0.208)              |
| Zhang      | 43 | 43.0% (25-62)%     |              |                       |                         | -2.655 (0.272)              |
| Frey       | 35 |                    | 31% (15-49)% |                       |                         | -3.020(0.250)               |
| Park       | 53 |                    |              | 6.10 (5.10-11.5)      |                         | -2.175 (0.212)              |
| Gu         | 20 |                    |              | 6.93(3.13-10.73)      |                         | -2.302 (0.314)              |
| Dai (2015) | 9  |                    |              |                       | Reported Data           | -2.708 (0.577)              |
| Dai (2020) | 6  |                    |              |                       | Reported Data           | -1.357 (0.354)              |
| Hua        | 11 |                    |              |                       | Reported Data           | -3.390 (0.577)              |
| Hu         | 15 |                    |              |                       | Reported Data           | -1.430 (0.316)              |
| Hay        | 53 |                    |              |                       | Data based on KM curve  | -2.772 (0.164)              |
| Jiang      | 58 |                    |              |                       | Reported Data           | -2.793 (0.183)              |
| Li         | 10 |                    |              |                       | Reported Data           | -1.792 (0.408)              |
| Shah       | 55 |                    |              | 11.6 (2.7-15.5)       |                         | -2.818 (0.446]              |
| Wang BJH   | 23 |                    |              |                       | Data based on KM curve  | -3.076 (0.354)              |

Figure S1: Risk of bias summary

| Author           | Was the hypothesis/ aim/ objective of the study stated? | Was the study conducted prospectively? | Were patients from more than one centre? | Were patients recruited consecutively? | Were the eligibility criteria clearly stated? | Were the characteristics of the patients included in the study described? | Did patients enter the study at a similar point in the disease? | Was the intervention of interest described? | Were additional interventions clearly described? | Were relevant outcome measures established a priori in the introduction or methods section? | Were outcome assessors blinded to the intervention that patients received? | Were the relevant outcomes measured using appropriate objective or subjective methods? | Were the relevant outcome measures made before and after the intervention? | The study does not perform selective outcome reporting? | Were details of the statistical tests reported? | Was follow-up period reported? | Did the study provide estimates of random variability in the data analysis of relevant outcomes? | Were the adverse events reported? | Were both competing interests and sources of support for the study reported? |
|------------------|---------------------------------------------------------|----------------------------------------|------------------------------------------|----------------------------------------|-----------------------------------------------|---------------------------------------------------------------------------|-----------------------------------------------------------------|---------------------------------------------|--------------------------------------------------|---------------------------------------------------------------------------------------------|----------------------------------------------------------------------------|----------------------------------------------------------------------------------------|----------------------------------------------------------------------------|---------------------------------------------------------|-------------------------------------------------|--------------------------------|--------------------------------------------------------------------------------------------------|-----------------------------------|------------------------------------------------------------------------------|
| Dai_2015,        | ?                                                       | ?                                      | -                                        | ?                                      | ?                                             | +                                                                         | +                                                               | +                                           | ?                                                | +                                                                                           | +                                                                          | +                                                                                      | +                                                                          | ?                                                       | +                                               | +                              | ?                                                                                                | ?                                 | +                                                                            |
| Dai_2020,        | +                                                       | +                                      | -                                        | ?                                      | +                                             | +                                                                         | +                                                               | +                                           | ?                                                | +                                                                                           | +                                                                          | +                                                                                      | +                                                                          | +                                                       | +                                               | +                              | ?                                                                                                | +                                 | +                                                                            |
| Frey,            | +                                                       | +                                      | -                                        | ?                                      | +                                             | +                                                                         | +                                                               | +                                           | ?                                                | +                                                                                           | +                                                                          | +                                                                                      | +                                                                          | +                                                       | +                                               | +                              | ?                                                                                                | +                                 | +                                                                            |
| Ou,              | +                                                       | +                                      | -                                        | ?                                      | +                                             | +                                                                         | +                                                               | +                                           | ?                                                | +                                                                                           | +                                                                          | +                                                                                      | +                                                                          | +                                                       | +                                               | +                              | ?                                                                                                | +                                 | +                                                                            |
| Hay,             | +                                                       | +                                      | -                                        | ?                                      | +                                             | +                                                                         | +                                                               | +                                           | +                                                | +                                                                                           | +                                                                          | +                                                                                      | +                                                                          | +                                                       | +                                               | +                              | ?                                                                                                | +                                 | +                                                                            |
| Hu,              | +                                                       | +                                      | -                                        | ?                                      | +                                             | +                                                                         | +                                                               | +                                           | ?                                                | +                                                                                           | +                                                                          | +                                                                                      | +                                                                          | +                                                       | +                                               | +                              | ?                                                                                                | ?                                 | +                                                                            |
| Hua,             | +                                                       | +                                      | -                                        | ?                                      | +                                             | +                                                                         | +                                                               | +                                           | ?                                                | +                                                                                           | +                                                                          | +                                                                                      | +                                                                          | +                                                       | +                                               | +                              | ?                                                                                                | ?                                 | +                                                                            |
| Jiang,           | +                                                       | +                                      | -                                        | ?                                      | +                                             | +                                                                         | +                                                               | +                                           | +                                                | +                                                                                           | +                                                                          | +                                                                                      | +                                                                          | +                                                       | +                                               | +                              | ?                                                                                                | ?                                 | +                                                                            |
| Li,              | +                                                       | +                                      | -                                        | ?                                      | ?                                             | +                                                                         | +                                                               | +                                           | ?                                                | +                                                                                           | +                                                                          | ?                                                                                      | +                                                                          | +                                                       | +                                               | +                              | ?                                                                                                | ?                                 | +                                                                            |
| Ma,              | +                                                       | +                                      | -                                        | ?                                      | +                                             | +                                                                         | +                                                               | +                                           | ?                                                | +                                                                                           | +                                                                          | ?                                                                                      | +                                                                          | +                                                       | +                                               | +                              | ?                                                                                                | ?                                 | +                                                                            |
| Ortiz-Maldonado, | +                                                       | +                                      | +                                        | ?                                      | +                                             | +                                                                         | +                                                               | +                                           | -                                                | +                                                                                           | +                                                                          | +                                                                                      | +                                                                          | +                                                       | +                                               | +                              | ?                                                                                                | ?                                 | +                                                                            |
| Park,            | +                                                       | +                                      | -                                        | ?                                      | +                                             | +                                                                         | +                                                               | +                                           | ?                                                | +                                                                                           | +                                                                          | +                                                                                      | +                                                                          | +                                                       | +                                               | +                              | ?                                                                                                | ?                                 | +                                                                            |
| Shah,            | +                                                       | +                                      | +                                        | ?                                      | +                                             | +                                                                         | +                                                               | +                                           | ?                                                | +                                                                                           | +                                                                          | +                                                                                      | +                                                                          | +                                                       | +                                               | +                              | ?                                                                                                | ?                                 | +                                                                            |
| Wang_BJH,        | +                                                       | +                                      | -                                        | ?                                      | +                                             | +                                                                         | +                                                               | +                                           | ?                                                | +                                                                                           | +                                                                          | +                                                                                      | +                                                                          | +                                                       | +                                               | +                              | ?                                                                                                | ?                                 | +                                                                            |
| Wang_Blood,      | +                                                       | +                                      | -                                        | ?                                      | +                                             | +                                                                         | +                                                               | +                                           | ?                                                | +                                                                                           | +                                                                          | +                                                                                      | +                                                                          | +                                                       | +                                               | +                              | ?                                                                                                | ?                                 | +                                                                            |
| Zhang,           | +                                                       | +                                      | -                                        | ?                                      | ?                                             | +                                                                         | +                                                               | +                                           | ?                                                | +                                                                                           | +                                                                          | +                                                                                      | +                                                                          | +                                                       | +                                               | +                              | ?                                                                                                | ?                                 | +                                                                            |



Figure S2 : Cytokine Release Syndrome (All Grade): 82% [61-95%]

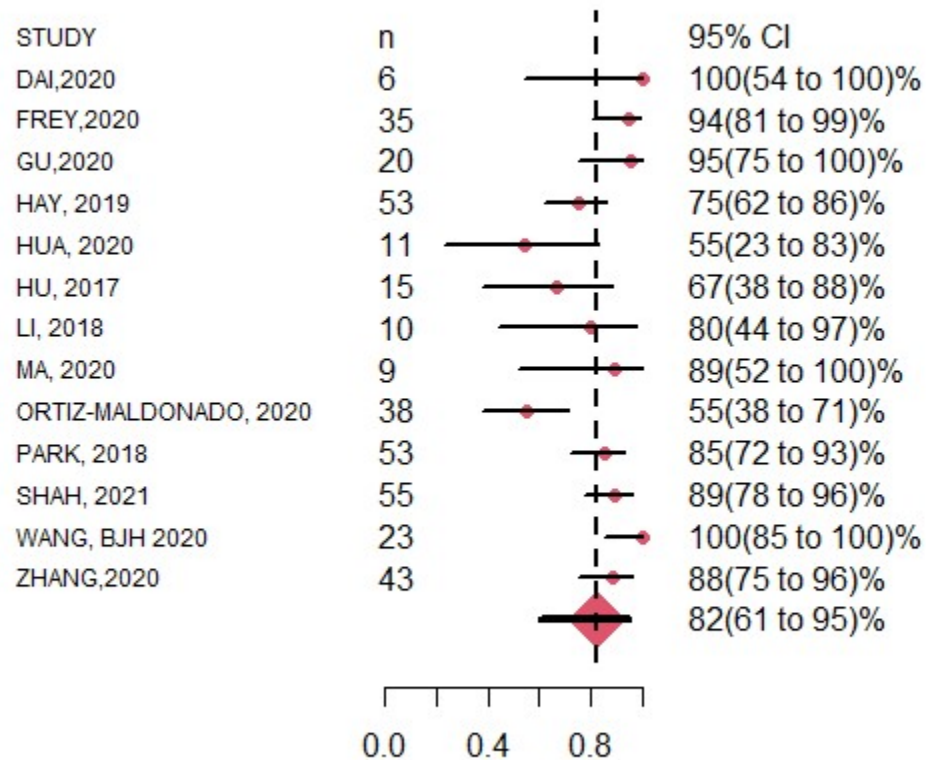

Cytokine release syndrome (all grade)

Figure S3: Cytokine Release Syndrome (Grade 3 or higher): 27% [18-36%]

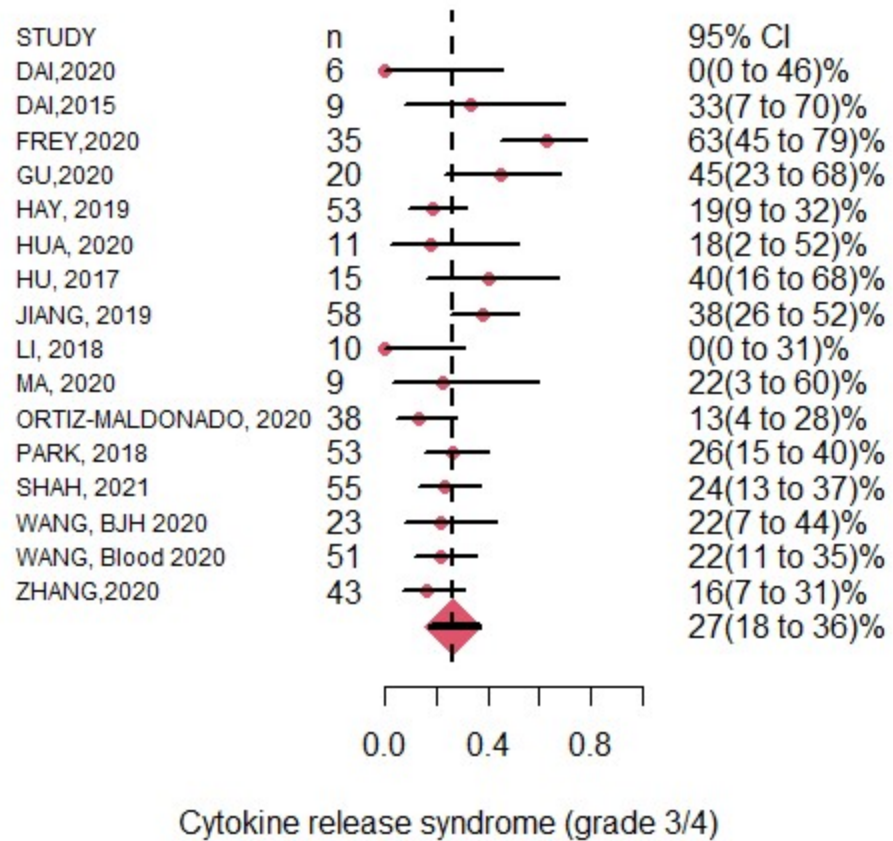

Figure S4: Neurotoxicity (All Grade): 34% [24-47%]

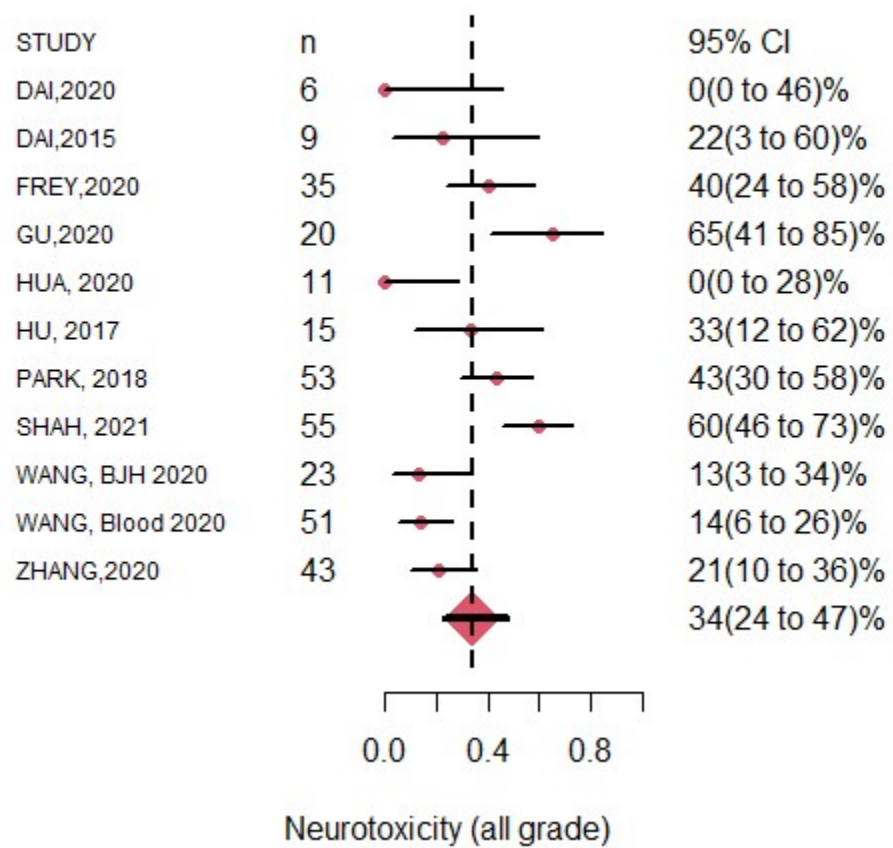

Figure S5: Neurotoxicity Grade 3 or higher: 14% [1-25%]

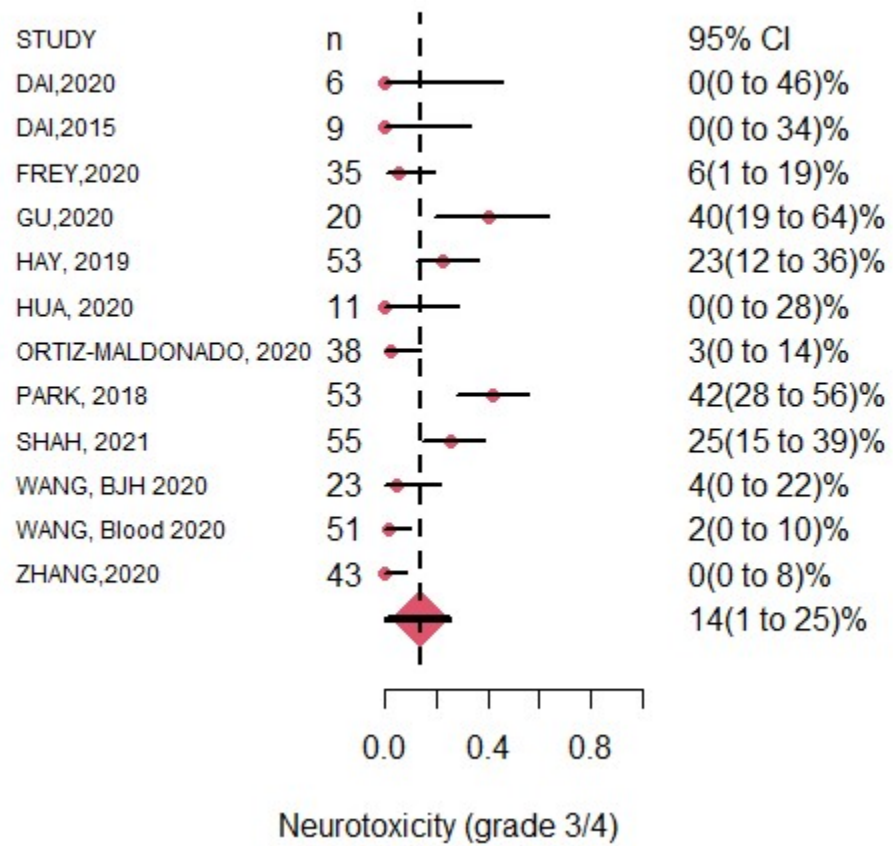

Figure S6: Progression free survival at 12-months for adult-only studies: 39% [18%-60%]

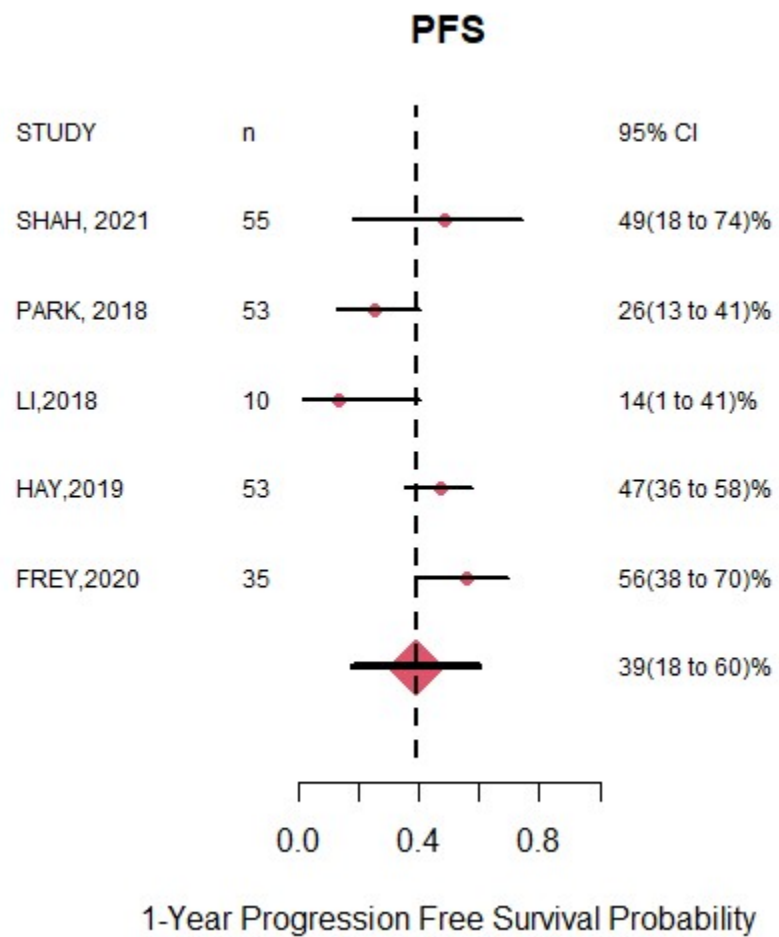

Figure S7: Overall survival at 12 months for adult only studies: 64% [52%-74%]

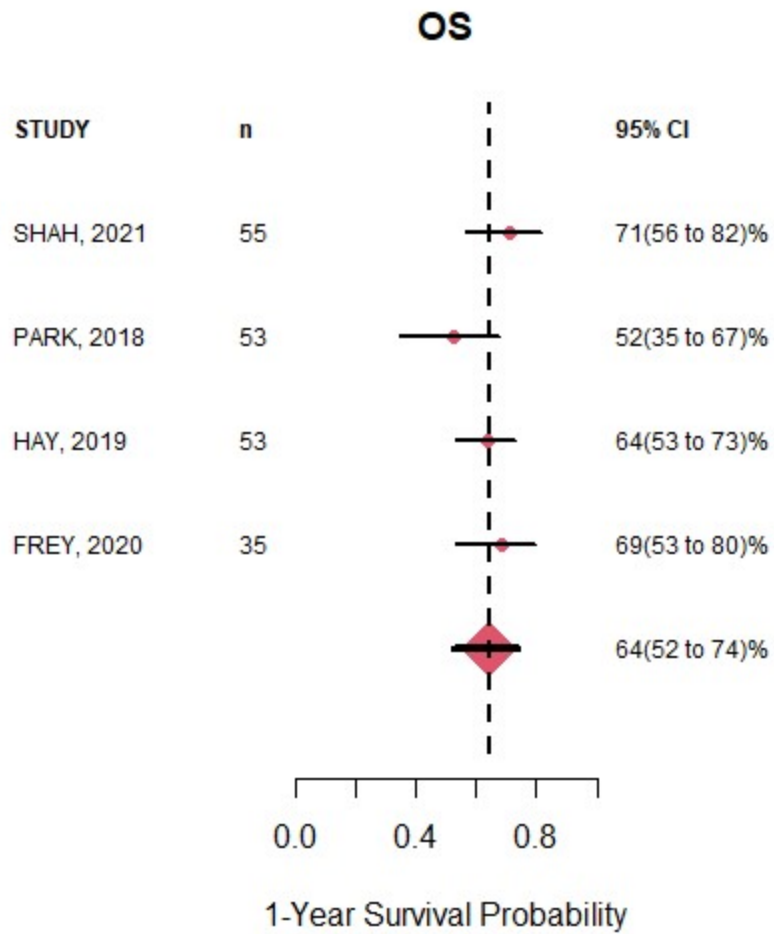

## References

1. Lee DW, Gardner R, Porter DL, et al. Current concepts in the diagnosis and management of cytokine release syndrome. *Blood*. Jul 2014;124(2):188-95. doi:10.1182/blood-2014-05-552729
2. Lee DW, Santomaso BD, Locke FL, et al. ASTCT Consensus Grading for Cytokine Release Syndrome and Neurologic Toxicity Associated with Immune Effector Cells. *Biol Blood Marrow Transplant*. 04 2019;25(4):625-638. doi:10.1016/j.bbmt.2018.12.758
3. Accessed from: [https://ctep.cancer.gov/protocoldevelopment/electronic\\_applications/ctc.htm](https://ctep.cancer.gov/protocoldevelopment/electronic_applications/ctc.htm).
4. Porter D, Frey N, Wood PA, Weng Y, Grupp SA. Grading of cytokine release syndrome associated with the CAR T cell therapy tisagenlecleucel. *J Hematol Oncol*. 03 2018;11(1):35. doi:10.1186/s13045-018-0571-y
5. Park JH, Rivière I, Gonen M, et al. Long-Term Follow-up of CD19 CAR Therapy in Acute Lymphoblastic Leukemia. *N Engl J Med*. 02 2018;378(5):449-459. doi:10.1056/NEJMoa1709919
